# Supplementary material for: Implementation of a Hamming distance–like genomic quantum classifier using inner products on ibmqx2 and ibmq_16_melbourne
Source: Springer Nature journal article supplement (doi:10.1007/s42484-020-00017-7), 2020-06-01
Supplement: 42484_2020_17_MOESM4_ESM.pdf [file 42484_2020_17_MOESM4_ESM.pdf]

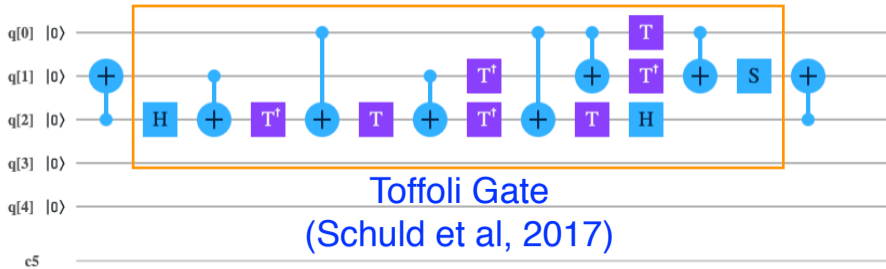

**Supplementary Figure 3:** Components of the Fredkin gate implementation we employed are shown in terms of IBM Q native operations, sourced from IBM Quantum Experience. Qubit  $q_0$  is in control and swaps  $q_1$  and  $q_2$ .
